# Supplementary material for: Cost-Effective Drug Switch Options After Unsuccessful Treatment With an SSRI for Depression
Source: Atypon-hosted journal article supplement (doi:10.1176/appi.ps.201500448), 2016-08-15

## Appendix

Table 1: Unit Costs for Healthcare Utilization

Table 2: Treatment Characteristics at level2

**Algorithm to determine the start and end dates of medication use**

To accurately reflect the study medication use at level2 of the trial, the start date was either the date of beginning of level2 or the recorded medication start date, whichever was later. In case of missing end dates at any assessment, the medication was assumed to be continued until the start date of the subsequent record of the same medication (or same medication type in case of concomitant medications). If the end date was missing at the last observation for a patient then the study medication was assumed to be continued up until the end of the level.

**Table 3: Unit Costs for Healthcare Utilization (US dollars 2014): Appendix**

| <b>Costs/unit</b>                       | <b>Mean</b> | <b>SD</b> | <b>Reference</b>                |
|-----------------------------------------|-------------|-----------|---------------------------------|
| <b>Depression Medications (\$/gm)</b>   |             |           |                                 |
| Bupropion                               | .04         | .006      | Red Book, Fundamental Reference |
| Sertraline                              | .09         | .05       | Red Book, Fundamental Reference |
| Venlafaxine                             | .09         | .04       | Red Book, Fundamental Reference |
| Citalopram                              | .24         | .15       | Red Book, Fundamental Reference |
| Nortryptline                            | 1.17        | 1.07      | Red Book, Fundamental Reference |
| <b>Concomitant Medications (\$/day)</b> |             |           |                                 |
| Trazodone                               | 2.13        | 1.82      | Red Book, Fundamental Reference |
| Sedatives                               | 5.92        | 6.39      | Red Book, Fundamental Reference |
| Anxiolytics                             | 10.11       | 8.24      | Red Book, Fundamental Reference |
| GI Medications                          | 1.91        | 3.23      | Red Book, Fundamental Reference |
| Erectile Dysfunction Medications        | 21.46       | 13.14     | Red Book, Fundamental Reference |
| <b>Healthcare Facility</b>              |             |           |                                 |
| Outpatient Visit (\$/visit)             | 66.59       | 44.53     | Physician Fee Schedule          |
| Emergency Room (\$/visit)               | 83.32       | 62.17     | Physician Fee Schedule          |
| Hospitalization (\$/day)                | 2446        | 22.52     | HCUP                            |

**Table 4: Treatment Characteristics at Level2 Appendix**

|                                   | BUP (N=239) |    | SER (N=238) |    | VEN (N=250) |    | P-value |
|-----------------------------------|-------------|----|-------------|----|-------------|----|---------|
|                                   | N           | %  | N           | %  | N           | %  |         |
| Time in level2 (weeks), Mean (SD) | 8.3 (5.01)  | 5  | 9.1         | 5  | 9.3         | 5  | .058    |
| Action at level2 End              |             |    |             |    |             |    | .092    |
| Follow-up (n=257)                 | 69          | 29 | 87          | 37 | 101         | 40 |         |
| Terminate/Dropouts (n=243)        | 87          | 36 | 75          | 32 | 81          | 32 |         |
| Enrolled in L3 (n =227)           | 83          | 35 | 76          | 32 | 68          | 27 |         |

\*Kruskal-wallis for continuous variable and chi-square for categorical variable

**Figure 1: Scatter plot reflecting uncertainty in costs and effectiveness**

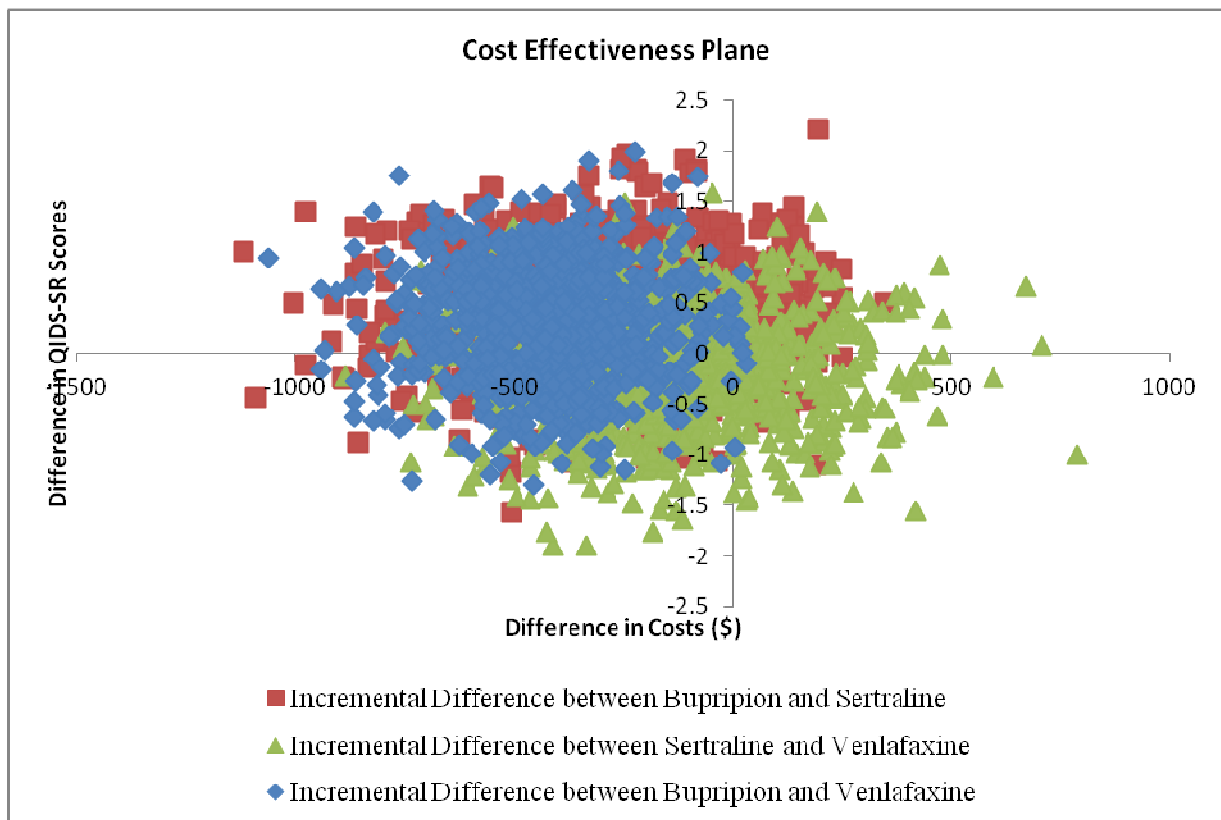

Supplement: appi.ps.201500448.ds001.pdf [file appi.ps.201500448.ds001.pdf]
