# Supplementary material for: Cost-Effective Drug Switch Options After Unsuccessful Treatment With an SSRI for Depression
Source: Atypon-hosted journal article supplement (doi:10.1176/appi.ps.201500448), 2016-08-15
Supplement: appi.ps.201500448.ds001.pdf [file appi.ps.201500448.ds001.pdf]

 


Psychiatry Online
